# Supplementary material for: Magnetocaloric Effect of Two Gd-Based Frameworks
Source: MDPI journal article supplement (doi:10.3390/inorganics10070091), 2022-06-25
Supplement: s1 [file s1]

## **Supporting Information**

### **Magnetocaloric Effect of Two Gd-based Frameworks**

Bo-Liang Liu, Qiao-Fei Xu, La-Sheng Long,\* and Lan-Sun Zheng

Collaborative Innovation Center of Chemistry for Energy Materials, State Key Laboratory of Physical Chemistry of Solid Surfaces and Department of Chemistry, College of Chemistry and Chemical Engineering, Xiamen University, Xiamen, 361005, China.

## Experimental Section

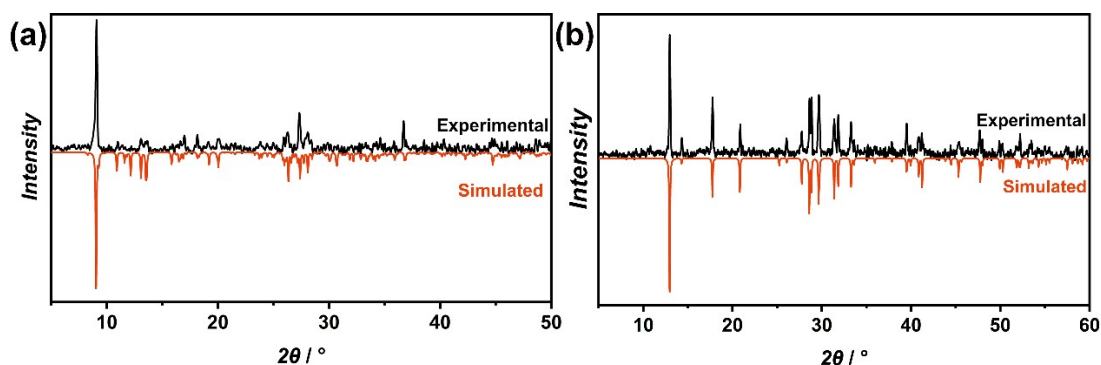

**Figure S1.** PXRD patterns for **1** (a) and **2** (b).

The PXRD patterns are consistent with the simulated ones based on the single-crystal structure determinations, suggesting the phase purity of **1** and **2**.

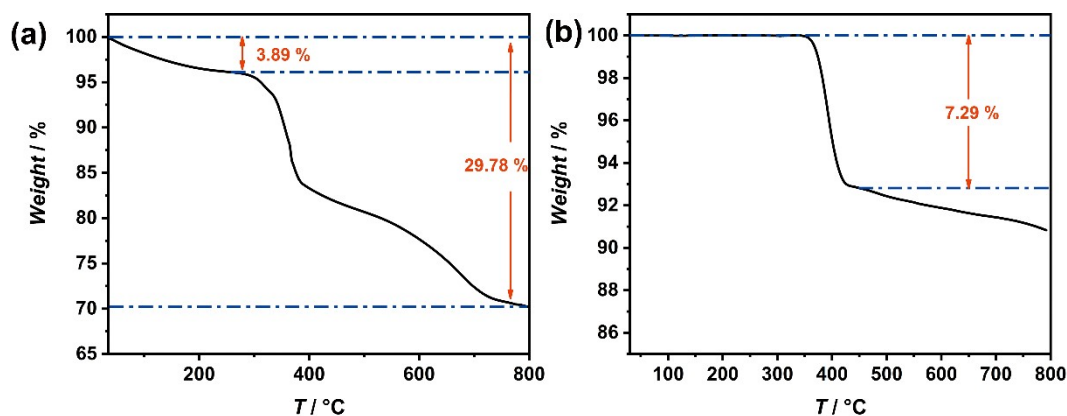

**Figure S2.** TGA curve of **1** (a) and **2** (b).

The TGA curve of **1** and **2** was carried out under  $N_2$  atmosphere. With temperature rising, **1** lost weight sustainedly, while **2** remained stable up to 350 °C. By the end of 265 °C, the weight loss of **1** is up to 3.89 %, attributed to the loss of 2.5  $H_2O$ . The final weight loss is up to 29.78 %, which matches the theoretical value 30.31 % calculated for  $Gd_2O_3$  as the residue. For **2**, when the temperature was raised to 430 °C, the weight loss of 7.29% matches well with that of 7.52% calculated by two  $H_2O$  indicating that the residue is  $Gd_2O_2SO_4$  at 430 °C. As the temperature rising up, the decrease of the curve attributes to the decomposition of  $SO_4^{2-}$ . Due to the limitations of the instrument, the following process will not be discussed.

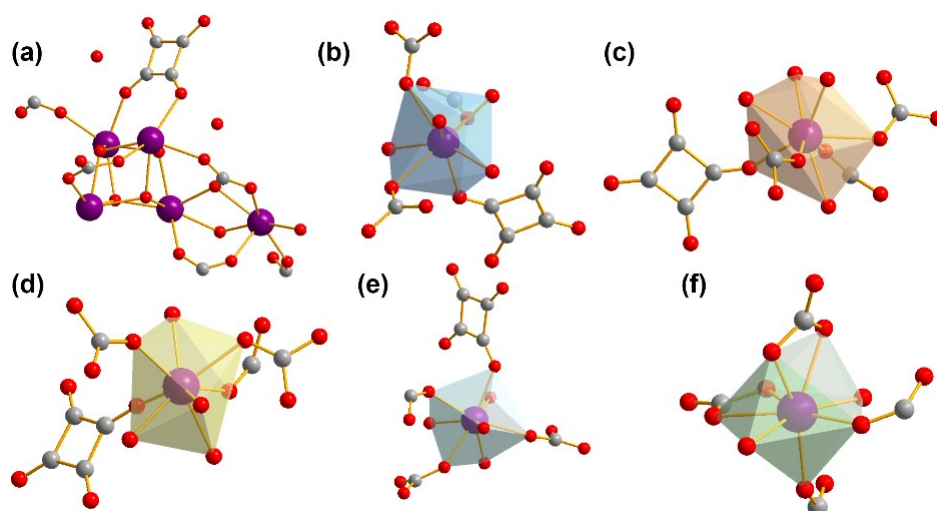

**Figure S3.** (a) Asymmetric unit of **1**; Coordination environment of  $\text{Gd}^{3+}$  in **1**: Gd1 (b), Gd2 (c), Gd3 (d), Gd4 (e), Gd5 (f). (Purple: Gd; Red: O; Grey: C)

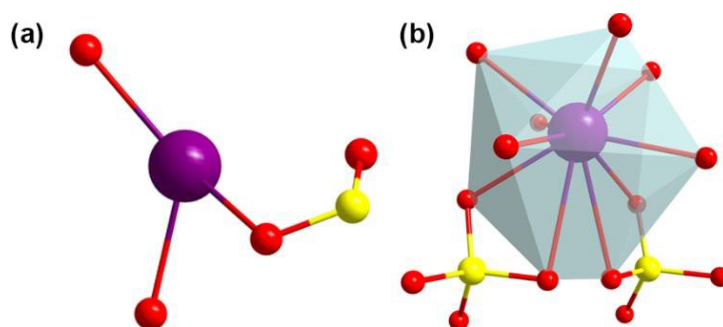

**Figure S4.** (a) Asymmetric unit of **2**; (b) Coordination environment of  $\text{Gd}^{3+}$  in **2**. (Purple: Gd; Red: O; Yellow: S)

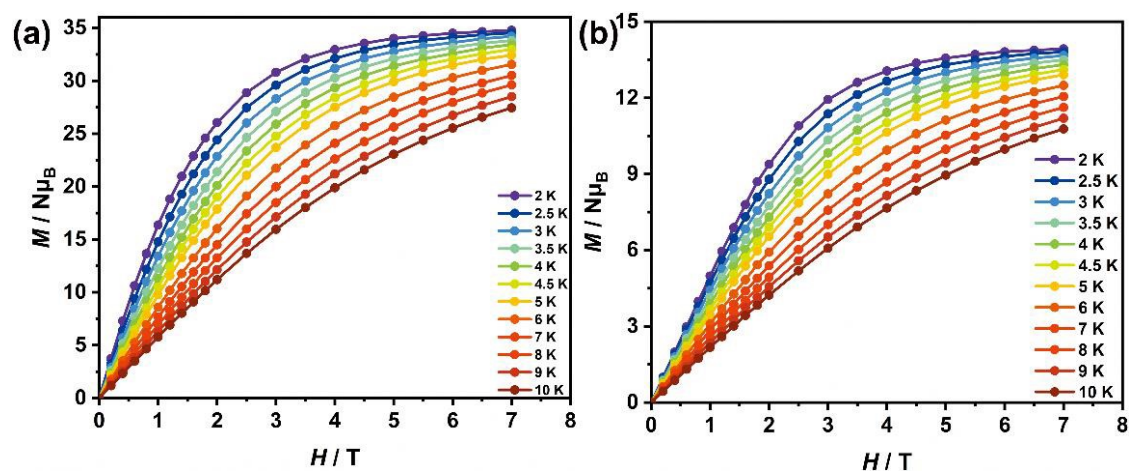

**Figure S5.** Plot of field-dependent magnetizations at 2–10 K for **1** (a) and **2** (b).

**Table S1.** BVS [1] calculations for oxygen atoms in the main structure of **1**.

| Atom | Bond  | $R_{ij}$ | $R_0$ | $S_{ij}$ | Assignment      |
|------|-------|----------|-------|----------|-----------------|
| O1   | Gd–O  | 2.436    | 2.031 | 0.335    | OH <sup>−</sup> |
|      | Gd–O  | 2.400    |       | 0.369    |                 |
|      | Gd–O  | 2.353    |       | 0.419    |                 |
|      | Total |          |       | 1.123    |                 |
| O2   | Gd–O  | 2.438    | 2.031 | 0.333    | OH <sup>−</sup> |
|      | Gd–O  | 2.412    |       | 0.357    |                 |
|      | Gd–O  | 2.398    |       | 0.371    |                 |
|      | Total |          |       | 1.061    |                 |
| O4   | Gd–O  | 2.399    | 2.031 | 0.370    | OH <sup>−</sup> |
|      | Gd–O  | 2.372    |       | 0.398    |                 |
|      | Gd–O  | 2.358    |       | 0.413    |                 |
|      | Total |          |       | 1.181    |                 |
| O6   | Gd–O  | 2.426    | 2.031 | 0.344    | OH <sup>−</sup> |
|      | Gd–O  | 2.411    |       | 0.358    |                 |
|      | Gd–O  | 2.372    |       | 0.398    |                 |
|      | Total |          |       | 1.100    |                 |
| O7   | Gd–O  | 2.422    | 2.031 | 0.348    | OH <sup>−</sup> |
|      | Gd–O  | 2.422    |       | 0.348    |                 |
|      | Gd–O  | 2.416    |       | 0.353    |                 |
|      | Total |          |       | 1.048    |                 |
| O17  | Gd–O  | 2.406    | 2.031 | 0.363    | OH <sup>−</sup> |
|      | Gd–O  | 2.384    |       | 0.385    |                 |
|      | Gd–O  | 2.383    |       | 0.386    |                 |
|      | Total |          |       | 1.134    |                 |

**Table S2.** BVS calculations for oxygen atoms in **2**.

| Atom | Bond  | $R_{ij}$ | $R_0$ | $S_{ij}$ | Assignment      |
|------|-------|----------|-------|----------|-----------------|
| O1   | Gd–O  | 2.439    | 2.031 | 0.332    | OH <sup>−</sup> |
|      | Gd–O  | 2.439    |       | 0.332    |                 |
|      | Gd–O  | 2.399    |       | 0.370    |                 |
|      | Total |          |       | 1.034    |                 |
| O2   | Gd–O  | 2.385    | 2.031 | 0.384    | OH <sup>−</sup> |
|      | Gd–O  | 2.375    |       | 0.395    |                 |
|      | Gd–O  | 2.375    |       | 0.395    |                 |
|      | Total |          |       | 1.174    |                 |

The bond valence sum (BVS) analysis was used to determine the oxidation states of oxygen atoms in compound **1** and **2**. The calculation formula is  $S_{ij} = \exp[(R_0 - R_{ij})/b]$ , in which  $S_{ij}$  is the valence of the individual bond,  $R_{ij}$  is the observed bond length,  $R_0$  is a constant depended upon the bonded elements, and  $b$  is a constant of 0.37. As shown in Table S1 and Table S2, the total BVS values of O atoms are very close to the state of +1, for which we identify the states of all O atoms are assigned to hydroxyl groups.

**Table S3.** Crystal data for **1** and **2**.

| Compound                                                        | <b>1</b>                                                         | <b>2</b>                                        |
|-----------------------------------------------------------------|------------------------------------------------------------------|-------------------------------------------------|
| Formula                                                         | C <sub>9</sub> H <sub>12</sub> Gd <sub>5</sub> O <sub>24.5</sub> | Gd <sub>2</sub> H <sub>4</sub> O <sub>8</sub> S |
| Formula weight                                                  | 1300.45                                                          | 478.59                                          |
| Temperature/K                                                   | 294                                                              | 100                                             |
| Crystal system                                                  | Monoclinic                                                       | Monoclinic                                      |
| Space group                                                     | <i>P2<sub>1</sub>/c</i>                                          | <i>C2/m</i>                                     |
| <i>a</i> / Å                                                    | 10.909 (2)                                                       | 13.832 (3)                                      |
| <i>b</i> / Å                                                    | 10.909 (2)                                                       | 3.650 (6)                                       |
| <i>c</i> / Å                                                    | 20.068 (3)                                                       | 6.268 (13)                                      |
| $\alpha$ / °                                                    | 90                                                               | 90                                              |
| $\beta$ / °                                                     | 101.748 (2)                                                      | 99.07 (2)                                       |
| $\gamma$ / °                                                    | 90                                                               | 90                                              |
| <i>V</i> / Å <sup>3</sup>                                       | 2342.02 (15)                                                     | 312.45 (11)                                     |
| <i>Z</i>                                                        | 4                                                                | 2                                               |
| <i>D<sub>c</sub></i> / g cm <sup>-3</sup>                       | 3.688                                                            | 5.087                                           |
| $\mu$ / mm <sup>-1</sup>                                        | 91.08                                                            | 139.16                                          |
| $\theta$ / °                                                    | 4.1–75.2                                                         | 6.5–72.2                                        |
| Observed reflections                                            | 13543                                                            | 1257                                            |
| <i>F</i> (000)                                                  | 2336                                                             | 424                                             |
| GOOF                                                            | 1.060                                                            | 1.117                                           |
| <i>R</i> <sub>1</sub> [ <i>I</i> > 2σ( <i>I</i> )] <sup>a</sup> | 0.029                                                            | 0.066                                           |
| <i>wR</i> <sub>2</sub> (All data) <sup>b</sup>                  | 0.071                                                            | 0.164                                           |

$$^a R_1 = \sum ||F_o| - |F_c|| / \sum |F_o| \quad ^b wR_2 = \{\sum[w(F_o^2 - F_c^2)^2] / \sum[w(F_o^2)^2]\}^{1/2}$$

**Table S4.** The Continuous Shape Measurements (CShM) [2] of 1.

|                       | <b>Gd</b>    |              |              |              |              |
|-----------------------|--------------|--------------|--------------|--------------|--------------|
|                       | Gd1          | Gd2          | Gd3          | Gd4          | Gd5          |
| OP-8 ( $D_{8h}$ )     | 31.143       | 30.200       | 30.513       | 30.857       | 31.702       |
| HPY-8 ( $C_{7v}$ )    | 23.254       | 23.178       | 22.288       | 22.625       | 22.206       |
| HBPY-8 ( $D_{6h}$ )   | 14.389       | 14.825       | 15.391       | 15.972       | 16.370       |
| CU-8 ( $O_h$ )        | 7.986        | 8.494        | 9.450        | 9.914        | 14.878       |
| SAPR-8 ( $D_{4d}$ )   | 2.761        | 2.369        | <b>0.998</b> | <b>1.162</b> | 6.828        |
| TDD-8 ( $D_{2d}$ )    | <b>0.249</b> | <b>0.275</b> | 1.620        | 1.358        | 4.786        |
| JGBF-8 ( $D_{2d}$ )   | 14.802       | 14.523       | 15.750       | 14.956       | 14.217       |
| JETBPY-8 ( $D_{3h}$ ) | 28.673       | 28.951       | 28.533       | 28.784       | 25.037       |
| JBTP-8 ( $C_{2v}$ )   | 3.126        | 2.895        | 2.392        | 2.242        | 5.025        |
| BTPR-8 ( $C_{2v}$ )   | 2.593        | 2.412        | 1.546        | 1.483        | <b>4.142</b> |
| JSD-8 ( $D_{2d}$ )    | 3.002        | 2.829        | 4.629        | 4.060        | 6.501        |
| TT-8 ( $T_d$ )        | 8.849        | 9.335        | 10.074       | 10.585       | 15.611       |
| ETBPY-8 ( $D_{3h}$ )  | 24.758       | 24.628       | 23.570       | 24.051       | 21.351       |

OP-8 = Octagon,  $D_{8h}$ ; HPY-8 = Heptagonal pyramid,  $C_{7v}$ ; HBPY-8 = Hexagonal bipyramid,  $D_{6h}$ ;  
 CU-8 = Cube,  $O_h$ ; SAPR-8 = Square antiprism,  $D_{4d}$ ; TDD-8 = Triangular dodecahedron,  $D_{2d}$ ;  
 JGBF-8 = Johnson-Gyrobifastigium J26,  $D_{2d}$ ; JETBPY-8 = Johnson-Elongated triangular  
 bipyramid J14,  $D_{3h}$ ; JBTP-8 = Johnson-Biaugmented trigonal prism J50,  $C_{2v}$ ; BTPR-8 =  
 Biaugmented trigonal prism,  $C_{2v}$ ; JSD-8= Snub disphenoid J84,  $D_{2d}$ ; TT-8= Triakis tetrahedron,  
 $T_d$ ; ETBPY-8 =Elongated trigonal bipyramid,  $D_{3h}$ .

**Table S5.** The Continuous Shape Measurements (CShM) of **2**.

|                         | Gd           |
|-------------------------|--------------|
| DP-10 ( $D_{8h}$ )      | 32.174       |
| EPY-10 ( $C_{9v}$ )     | 18.989       |
| OBPY-10 ( $D_{8h}$ )    | 19.270       |
| PPR-10 ( $D_{5h}$ )     | 14.624       |
| PAPR-10 ( $D_{5d}$ )    | 14.707       |
| JBCCU-10 ( $D_{4h}$ )   | 18.264       |
| JBCSAPR-10 ( $D_{4d}$ ) | 12.582       |
| JMBIC-10 ( $C_{2v}$ )   | <b>5.163</b> |
| JATDI-10 ( $C_{3v}$ )   | 16.184       |
| JSPC-10 ( $C_{2v}$ )    | 9.240        |
| SDD-10 ( $D_2$ )        | 9.397        |
| TD-10 ( $C_{2v}$ )      | 9.325        |
| HD-10 ( $D_{4h}$ )      | 15.205       |

DP-10 = Decagon; EPY-10 = Enneagonal pyramid; OBPY-10 = Octagonal bipyramid; PPR-10 = Pentagonal prism; PAPR-10 = Pentagonal antiprism; JBCCU-10 = Bicapped cube; JBCSAPR-10 = Bicapped square antiprism; JMBIC-10 = Metabidiminshed icosahedron; JATDI-10 = Augmented tridiminshed icosahedron; JSPC-10 = Sphenocorona; SDD-10 = Staggered Dodecahedron; TD-10 = Tetradecahedron; HD-10 = Hexadecahedron.



**Table S6.** Selected bond distances (Å) and bond angles (°) of **1**.

|            |           |            |           |
|------------|-----------|------------|-----------|
| Gd1—O1     | 2.436 (4) | O1—Gd2i    | 2.400 (4) |
| Gd1—O4i    | 2.399 (4) | O2—Gd4iv   | 2.412 (4) |
| Gd1—O5     | 2.412 (4) | O3—Gd4viii | 2.400 (4) |
| Gd1—O6     | 2.426 (4) | O3—Gd5iii  | 2.438 (4) |
| Gd1—O12    | 2.312 (5) | O4—Gd1iv   | 2.399 (4) |
| Gd1—O17    | 2.383 (4) | O6—Gd2iii  | 2.411 (4) |
| Gd1—O18ii  | 2.443 (4) | O7—Gd3v    | 2.416 (4) |
| Gd1—O21iii | 2.400 (5) | O7—Gd4ix   | 2.422 (4) |
| Gd2—O1iv   | 2.400 (4) | O8—Gd5iii  | 2.435 (5) |
| Gd2—O2     | 2.438 (4) | O9—Gd4ix   | 2.425 (5) |
| Gd2—O4     | 2.358 (4) | O10—Gd3v   | 2.425 (4) |
| Gd2—O6iii  | 2.411 (4) | O14—Gd3x   | 2.505 (4) |
| Gd2—O8     | 2.392 (5) | O14—Gd4iv  | 2.516 (5) |
| Gd2—O13    | 2.307 (5) | O17—Gd3i   | 2.406 (4) |
| Gd2—O15    | 2.425 (5) | O18—Gd1xi  | 2.443 (4) |
| Gd2—O18iv  | 2.459 (4) | O18—Gd2i   | 2.459 (4) |
| Gd3—O2     | 2.398 (4) | O19—Gd3v   | 2.426 (5) |
| Gd3—O4     | 2.372 (4) | O21—Gd1iii | 2.400 (5) |
| Gd3—O7v    | 2.416 (4) | Gd4—O14i   | 2.516 (5) |
| Gd3—O10v   | 2.425 (4) | Gd4—O17    | 2.384 (4) |
| Gd3—O11    | 2.418 (5) | Gd4—O22    | 2.445 (5) |
| Gd3—O14vi  | 2.505 (4) | Gd5—O3iii  | 2.438 (4) |
| Gd3—O17iv  | 2.406 (4) | Gd5—O5     | 2.432 (5) |
| Gd3—O19v   | 2.426 (5) | Gd5—O6     | 2.372 (4) |
| Gd4—O1     | 2.353 (4) | Gd5—O7     | 2.422 (4) |
| Gd4—O2i    | 2.412 (4) | Gd5—O8iii  | 2.435 (5) |
| Gd4—O3viii | 2.400 (4) | Gd5—O10    | 2.432 (4) |
| Gd4—O7vii  | 2.422 (4) | Gd5—O16    | 2.320 (5) |

|                   |             |                |             |
|-------------------|-------------|----------------|-------------|
| Gd4—O9vii         | 2.425 (5)   | Gd5—O20        | 2.298 (6)   |
| Gd2i—O1—Gd1       | 104.37 (14) | Gd5—O6—Gd1     | 111.93 (16) |
| Gd4—O1—Gd1        | 106.04 (15) | Gd5—O6—Gd2iii  | 110.32 (16) |
| Gd4—O1—Gd2i       | 108.67 (16) | Gd3v—O7—Gd4ix  | 116.37 (16) |
| Gd3—O2—Gd2        | 104.74 (15) | Gd3v—O7—Gd5    | 109.34 (16) |
| Gd3—O2—Gd4iv      | 107.38 (15) | Gd5—O7—Gd4ix   | 107.25 (15) |
| Gd4iv—O2—Gd2      | 105.54 (15) | Gd2—O8—Gd5iii  | 108.81 (17) |
| Gd4viii—O3—Gd5iii | 107.46 (17) | Gd3v—O10—Gd5   | 108.68 (16) |
| Gd2—O4—Gd1iv      | 106.86 (15) | Gd3x—O14—Gd4iv | 109.93 (17) |
| Gd2—O4—Gd3        | 108.14 (16) | Gd1—O17—Gd3i   | 105.60 (15) |
| Gd3—O4—Gd1iv      | 106.20 (15) | Gd1—O17—Gd4    | 106.75 (16) |
| Gd1—O5—Gd5        | 110.33 (17) | Gd4—O17—Gd3i   | 108.02 (16) |
| Gd2iii—O6—Gd1     | 110.86 (16) | Gd1xi—O18—Gd2i | 108.69 (16) |

---

Symmetry codes: (i)  $x, -y+1/2, z+1/2$ ; (ii)  $-x+1, y+1/2, -z+3/2$ ; (iii)  $-x+1, -y+1, -z+1$ ; (iv)  $x, -y+1/2, z-1/2$ ; (v)  $-x+1, -y, -z+1$ ; (vi)  $-x, y-1/2, -z+1/2$ ; (vii)  $x-1, y, z$ ; (viii)  $-x, -y+1, -z+1$ ; (ix)  $x+1, y, z$ ; (x)  $-x, y+1/2, -z+1/2$ ; (xi)  $-x+1, y-1/2, -z+3/2$ .

**Table S7.** Selected bond distances (Å) and bond angles (°) of **2**.

|                 |            |               |            |
|-----------------|------------|---------------|------------|
| Gd1—O3ii        | 2.518 (10) | Gd1—O1v       | 2.439 (9)  |
| Gd1—O3          | 2.518 (10) | Gd1—O1        | 2.399 (15) |
| Gd1—O2iii       | 2.375 (8)  | Gd1—O1vi      | 2.439 (9)  |
| Gd1—O2iv        | 2.375 (8)  | Gd1—O2        | 2.385 (13) |
| Gd1i—O3—Gd1     | 92.9 (5)   | Gd1—O1—Gd1vi  | 109.0 (4)  |
| Gd1iii—O2—Gd1   | 110.8 (4)  | Gd1vi—O1—Gd1v | 96.8 (5)   |
| Gd1iv—O2—Gd1iii | 100.4 (5)  | Gd1—O1—Gd1v   | 109.0 (4)  |
| Gd1iv—O2—Gd1    | 110.8 (4)  |               |            |

Symmetry codes: (i)  $x, y-1, z$ ; (ii)  $x, y+1, z$ ; (iii)  $-x+3/2, -y+3/2, -z+1$ ; (iv)  $-x+3/2, -y+5/2, -z+1$ ; (v)  $-x+3/2, -y+3/2, -z+2$ ; (vi)  $-x+3/2, -y+5/2, -z+2$ .

## Reference

- (1) Brown, I. D.; Altermatt, D. Bond-Valence Parameters Obtained from a Systematic Analysis of the Inorganic Crystal Structure Database. *Acta Cryst. B* **1985**, *41*, 244–247.
- (2) Alvarez, S.; Alemany, P.; Casanova, D.; Cirera, J.; Llunell, M.; Avnir, D. Shape Maps and Polyhedral Interconversion Paths in Transition Metal Chemistry. *Coord. Chem. Rev.* **2005**, *249*, 1693–1708.
